# Supplementary material for: A series of three-dimensional architectures constructed from lanthanide-substituted polyoxometalosilicates and lanthanide cations or lanthanide–organic complexes as linkers
Source: Royal Society of Chemistry journal article supplement (doi:10.1039/c2dt30251a), 2012-01-01
Supplement: c2dt30251a.pdf [file c2dt30251a.pdf]

## Electronic Supplementary Information

**Fig. S1** (a) Monovacant  $[\text{SiW}_{11}\text{O}_{39}]^{8-}$  unit obtained by removing a  $\{\text{WO}_6\}$  octahedron in the cap site of the parent Keggin structure. (b) Polyhedral view of mono-Ln-substituted Keggin anions. (c) Polyhedral and ball-stick representation of the lanthanide-substituted double-Keggin-type polyoxoanion  $[\{(\text{H}_2\text{O})_4\text{La}(\text{SiW}_{11}\text{O}_{39})\}_2]^{10-}$  in **1** and **2**. (d) View of the two kinds of polyoxoanions  $[\{(\text{H}_2\text{O})_4\text{Nd}(\text{SiW}_{11}\text{O}_{39})\}_2]^{10-}$  and  $[\{(\text{H}_2\text{O})_3\text{Nd}(\text{SiW}_{11}\text{O}_{39})\}_2]^{10-}$  in **3** (color code: Si, yellow; W, green; La, blue gray; Nd, pink; O, red).

**Fig. S2** A space-filling diagram of the 3D channel framework of **1**, (color code: Si, yellow; W, green; La, blue gray; O, red). Other atoms have been omitted for clarity.

**Fig. S3** A space-filling diagram of the 3D channel framework of **3**, (color code: Si, yellow; W, green; Nd, pink; O, red). Other atoms have been omitted for clarity.

**Fig. S4** A space-filling diagram of the 3D channel framework of **4** (color code: Si, yellow; W, green; La, blue gray; O, red; N, oxford blue; C, dark gray). Other atoms have been omitted for clarity.

**Fig. S5** Schematic representation of the rutile topology of compound **4**.

**Fig. S6** (a) IR spectrum for compound **1**. (b) IR spectrum for compound **2**. (c) IR spectrum for compound **3**. (d) IR spectrum for compound **4**. (e) IR spectrum for compound **5**. (f) IR spectrum for compound **6**.

**Fig. S7** UV-vis spectra and analysis for compounds **1-6**.

**Fig. S8** (a) TG curve for compound **1**. (b) TG curve for compound **2**. (c) TG curve for

compound **3**. (d) TG curve for compound **4**. (e) TG curve for compound **5**. (f) TG curve for compound **6**.

**Fig. S9** (a) The calculated and experimental PXRD patterns for compound **1**. (b) The calculated and experimental PXRD patterns for compound **2**. (c) The calculated and experimental PXRD patterns for compound **3**. (d) The calculated and experimental PXRD patterns for compound **4**. (e) The calculated and experimental PXRD patterns for compound **5**. (f) The calculated and experimental PXRD patterns for compound **6**.

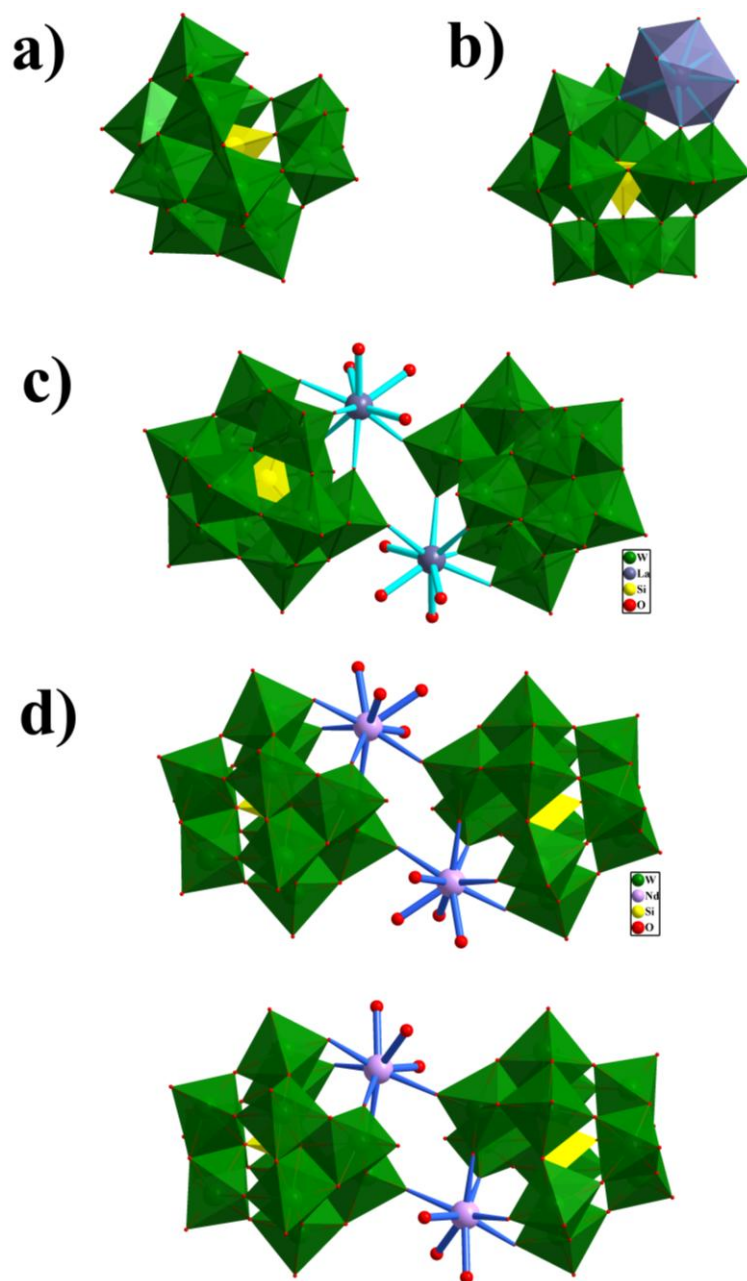

Fig. S1

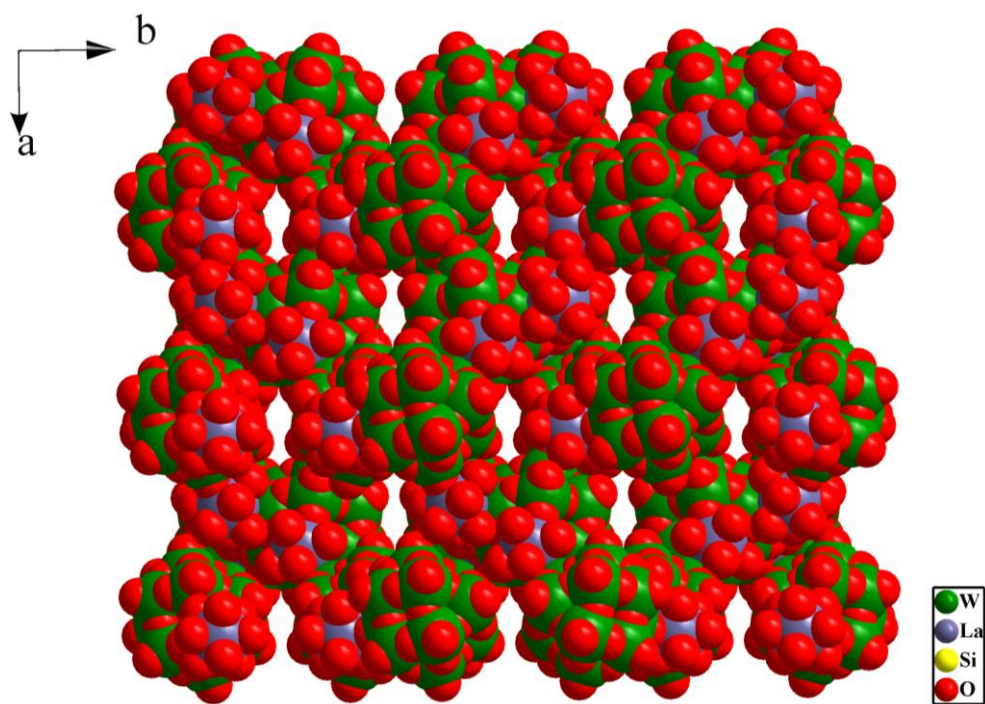

**Fig. S2**

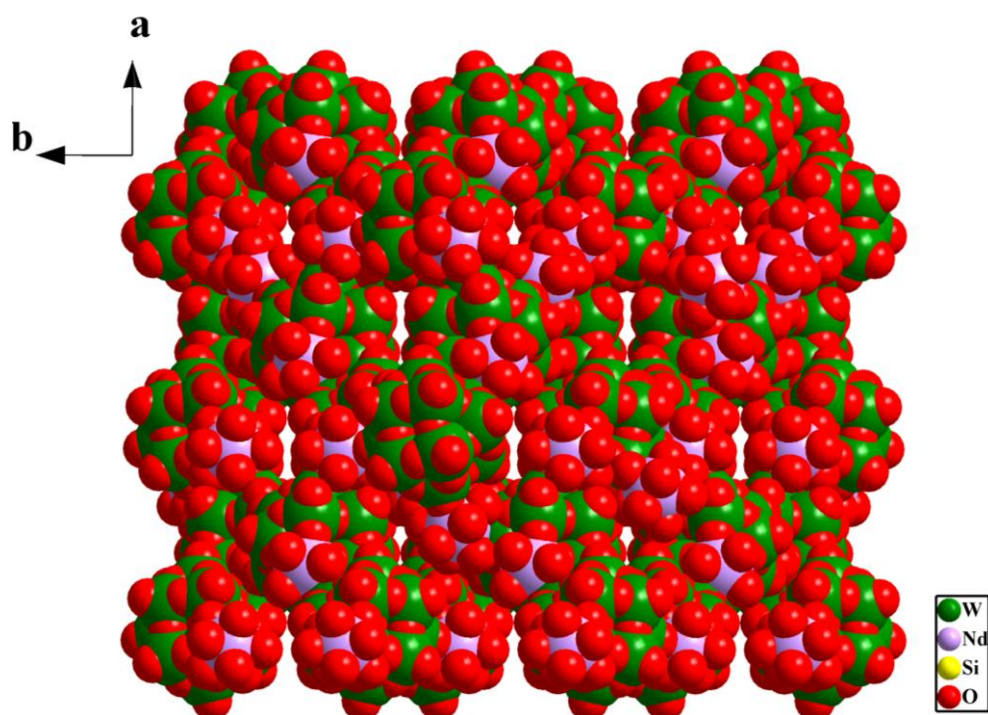

Fig. S3

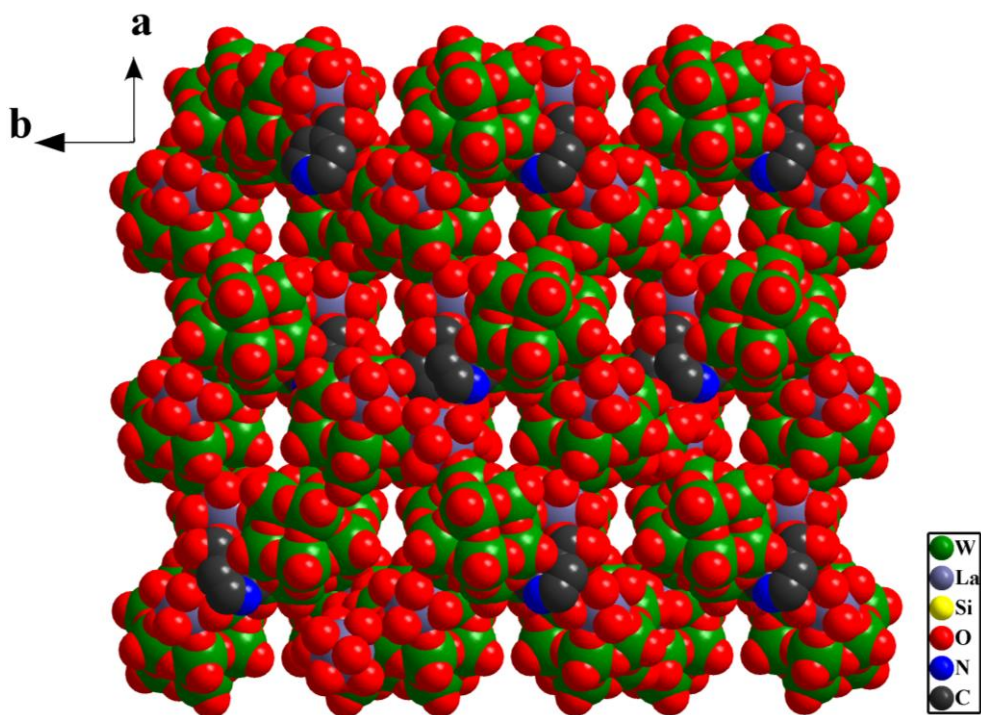

Fig. S4

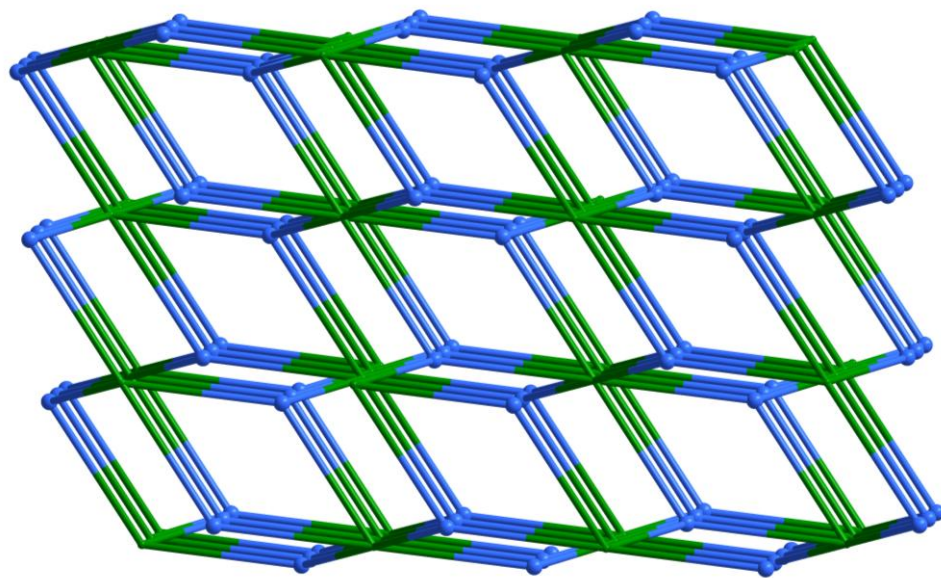

**Fig. S5**

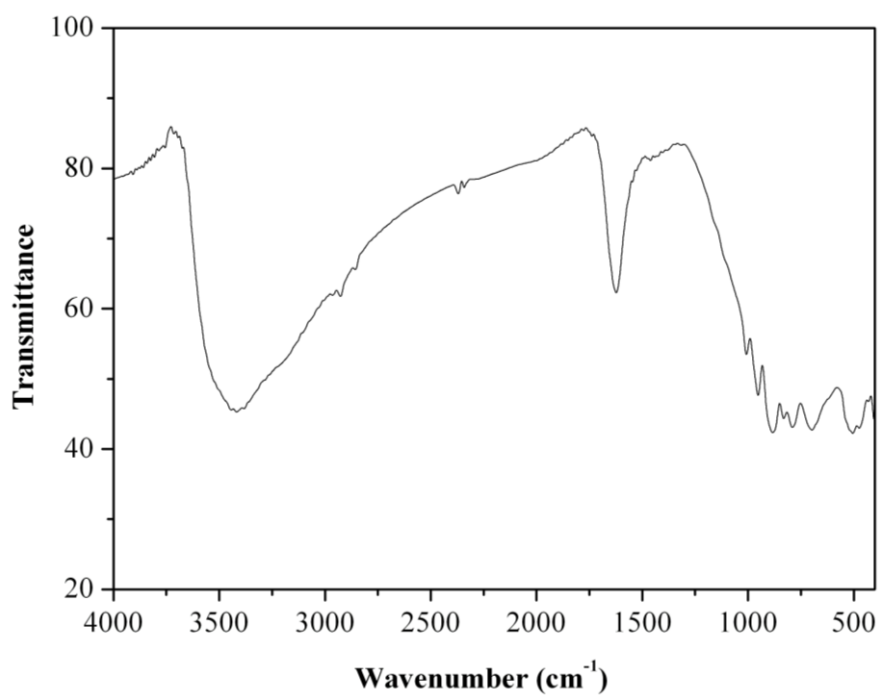

**Fig. S6a**

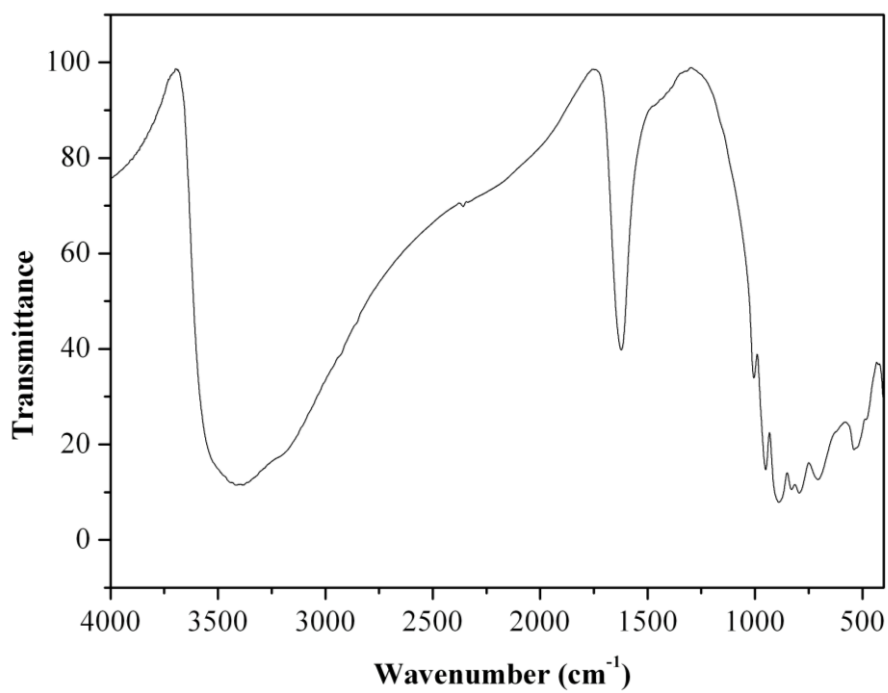

**Fig. S6b**



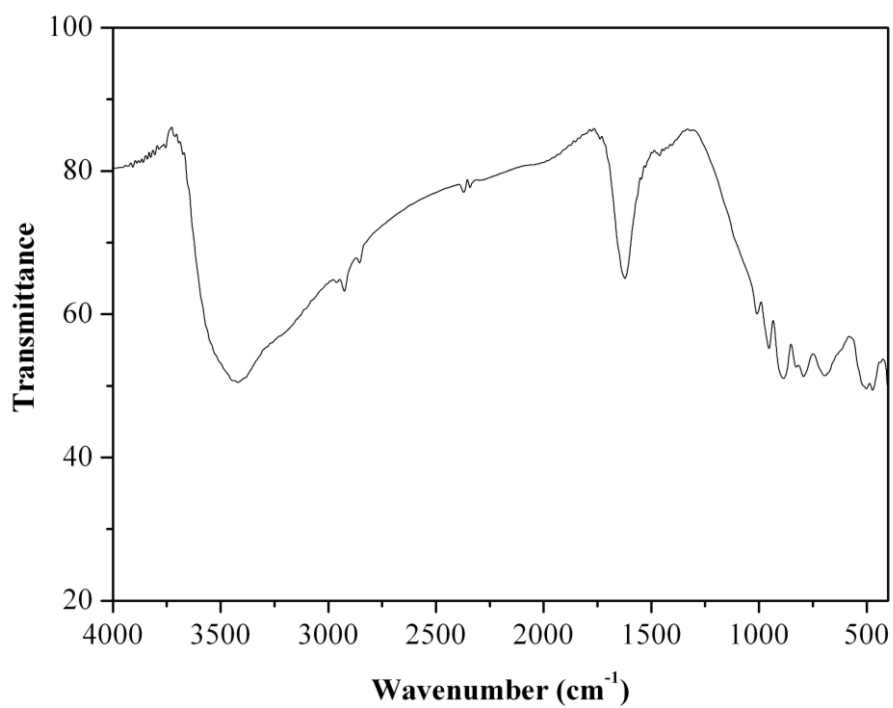

**Fig. S6c**

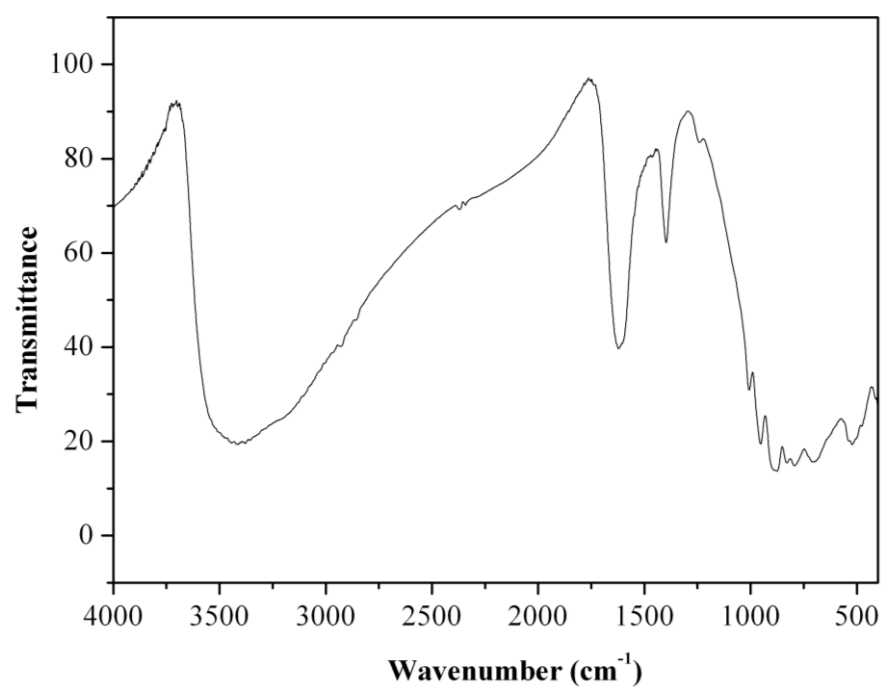

**Fig. S6d**

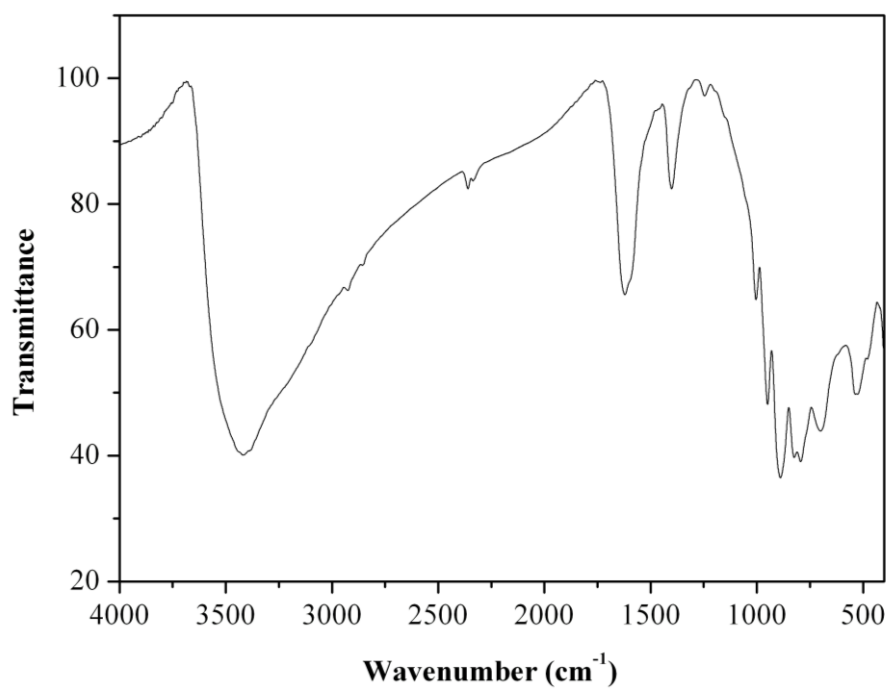

**Fig. S6e**

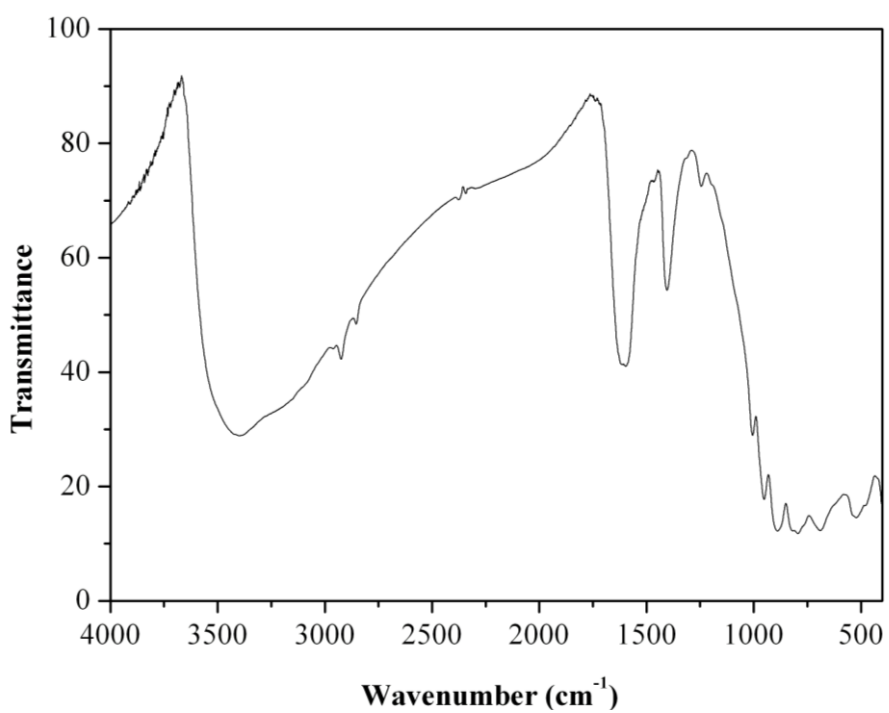

**Fig. S6f**

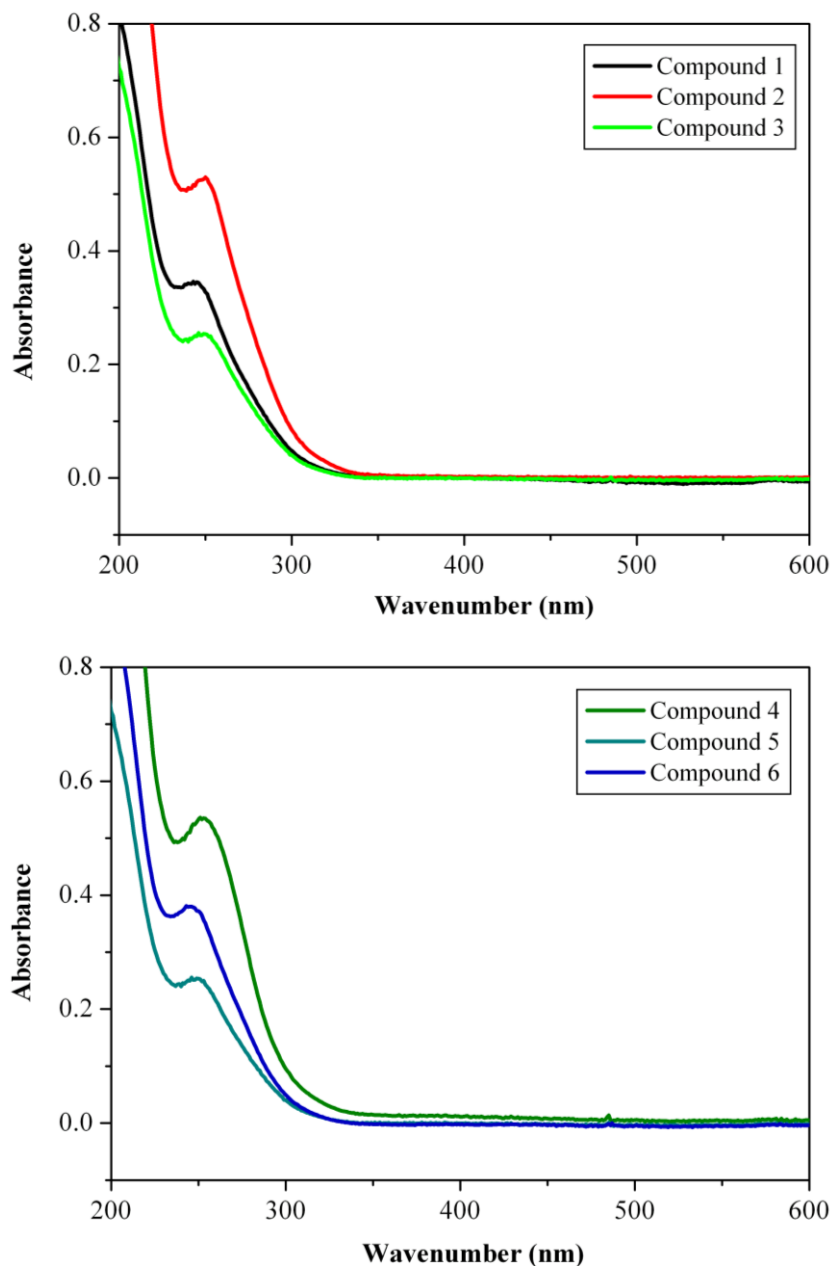

**Fig. S7**

### UV-vis spectra

The UV-vis spectra of compounds **1-6** are shown in Fig. S7, ranging from 190 to 600 nm. The plots display an intense absorption band for O→W charge transfer, which is characteristic of Keggin-type polyoxoanion.<sup>16,22</sup> The bands at 245 nm for **1**, 250 nm for **2**, 249 nm for **3**, 251 nm for **4**, 249 nm for **5**, and 246 nm for **6** are assigned to the  $p_{\pi}(\text{Ob,c}) \rightarrow d_{\pi^*}(\text{W})$  charge transfer transition.

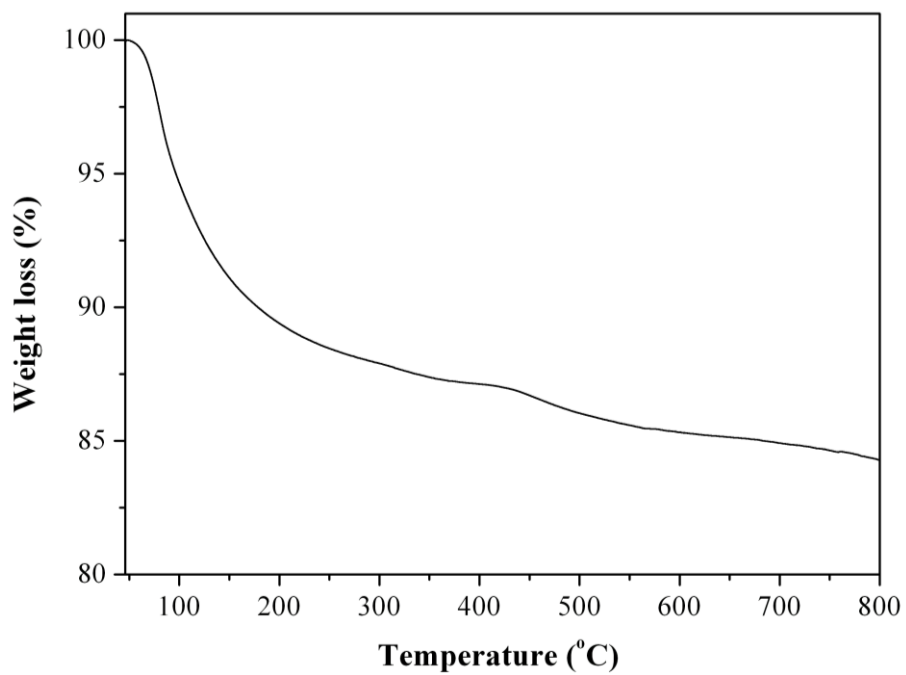

**Fig. S8a**

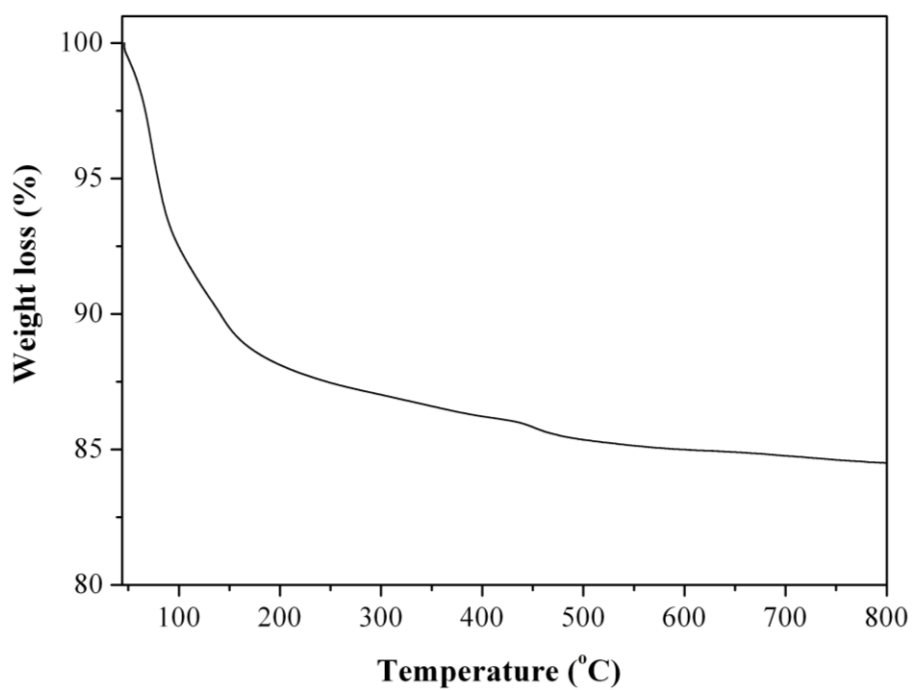

**Fig. S8b**

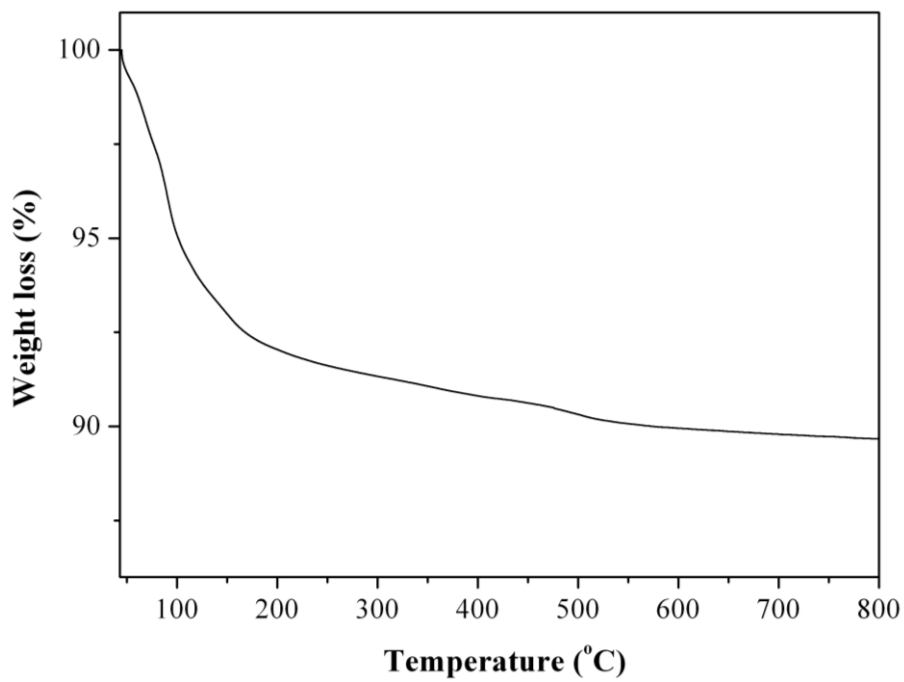

**Fig. S8c**

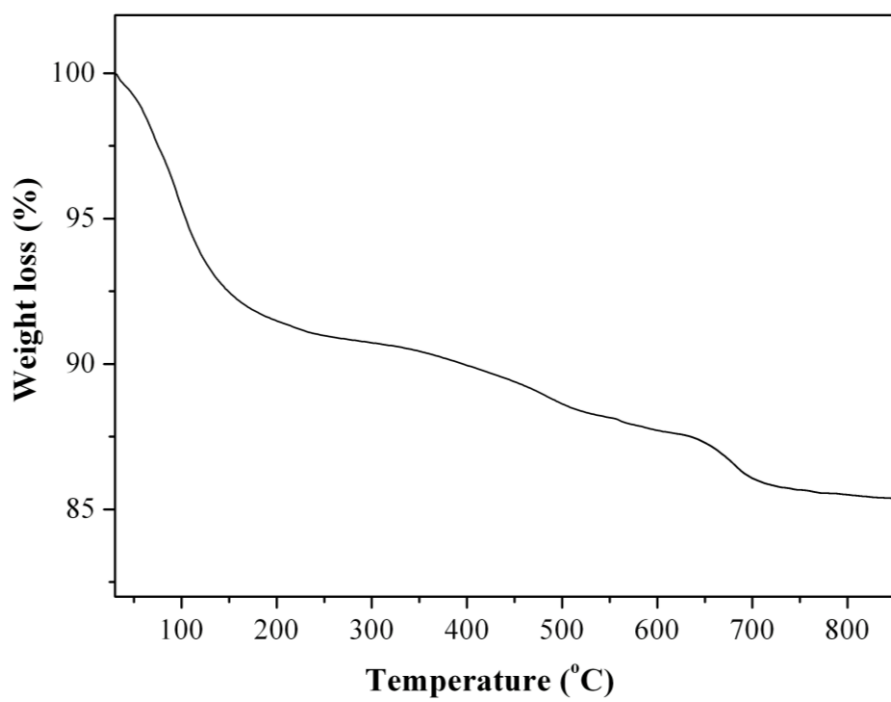

**Fig. S8d**

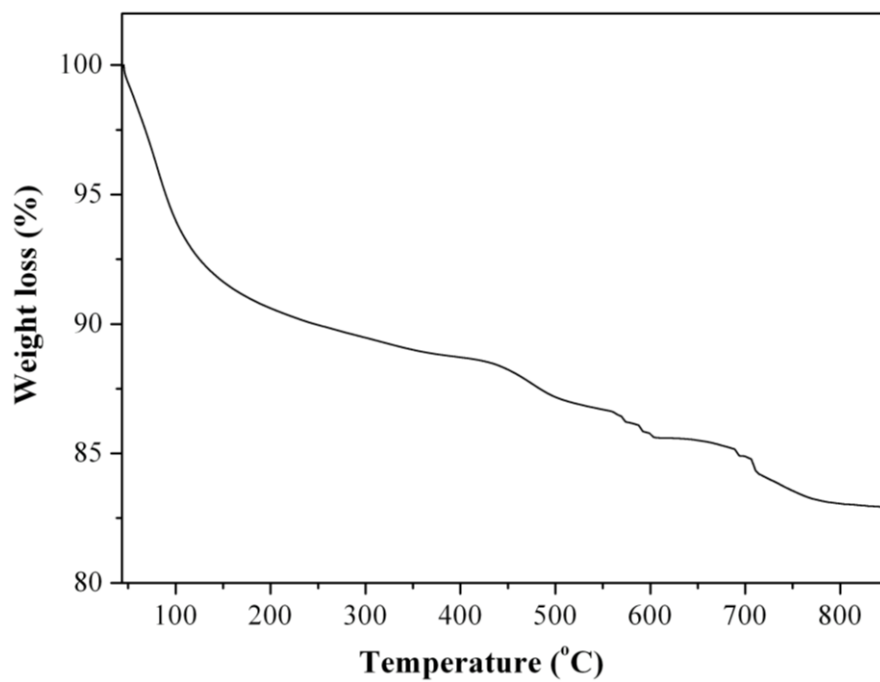

**Fig. S8e**

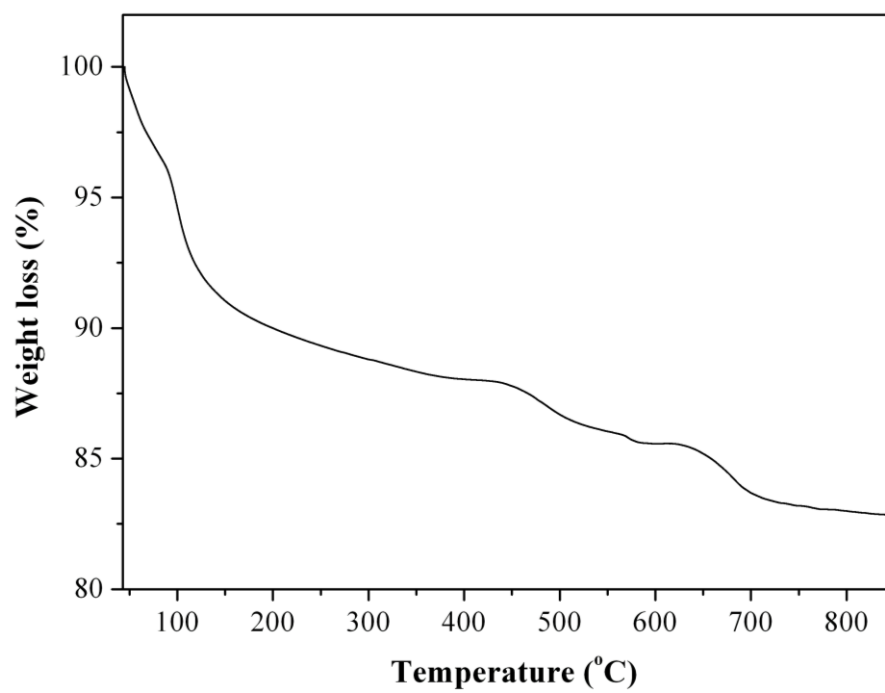

**Fig. S8f**

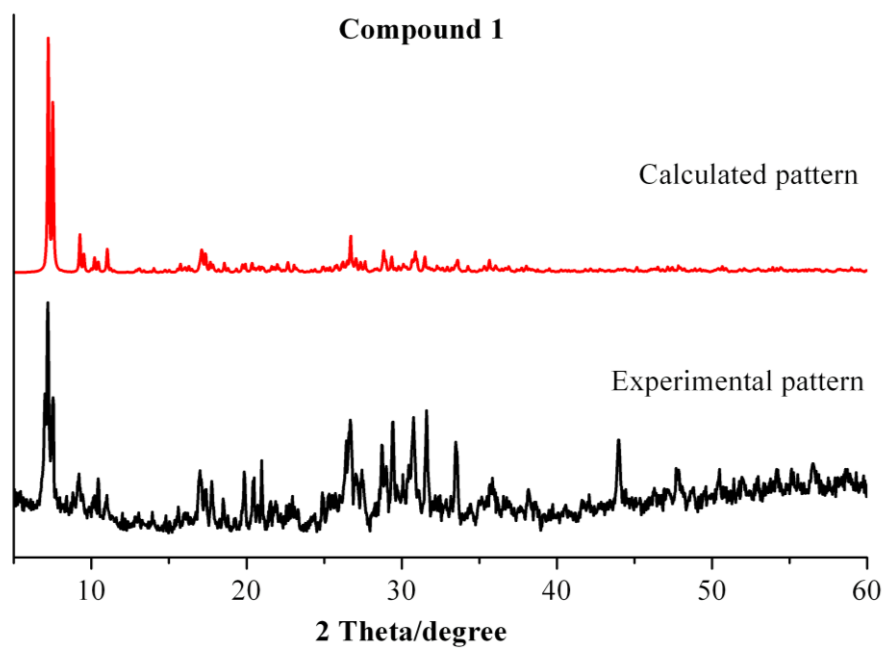

**Fig. S9a**

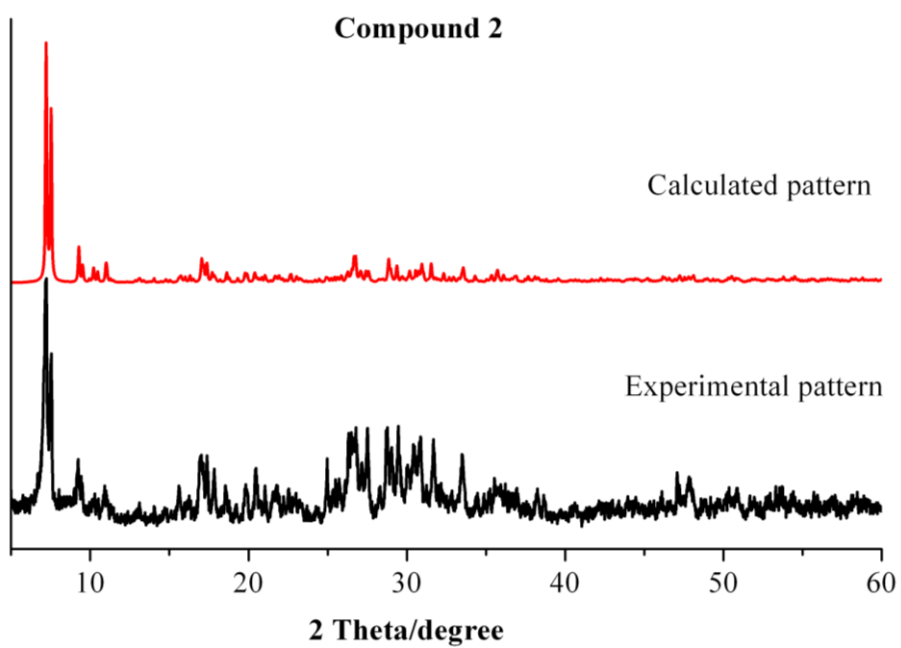

**Fig. S9b**

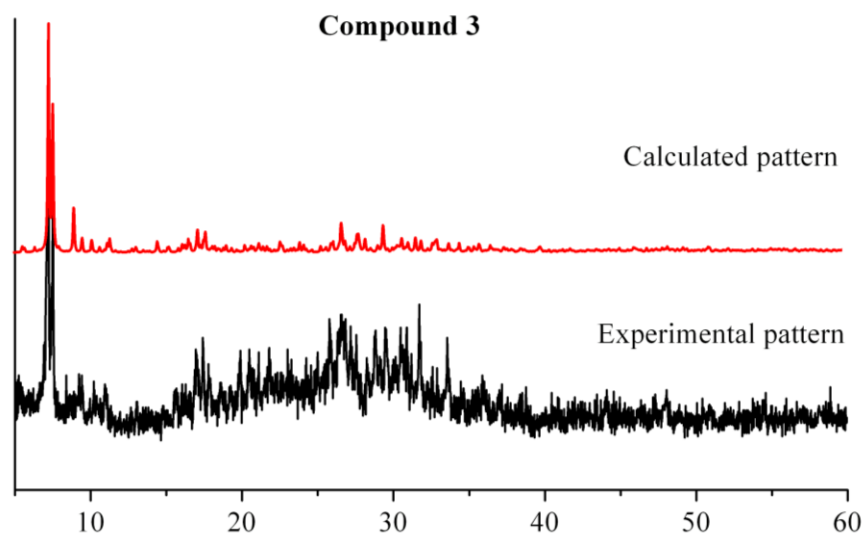

**Fig. S9c**

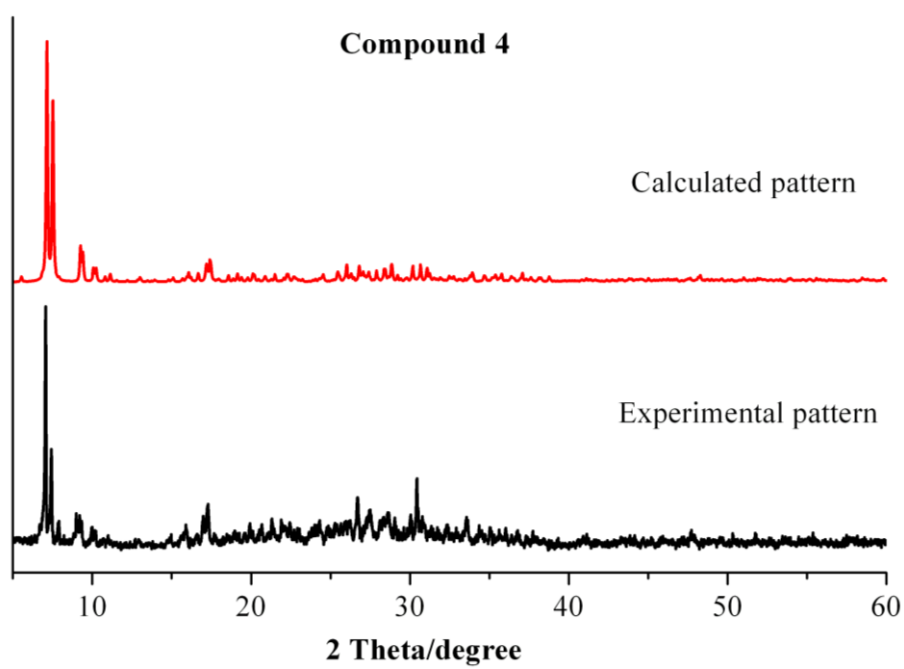

**Fig. S9d**



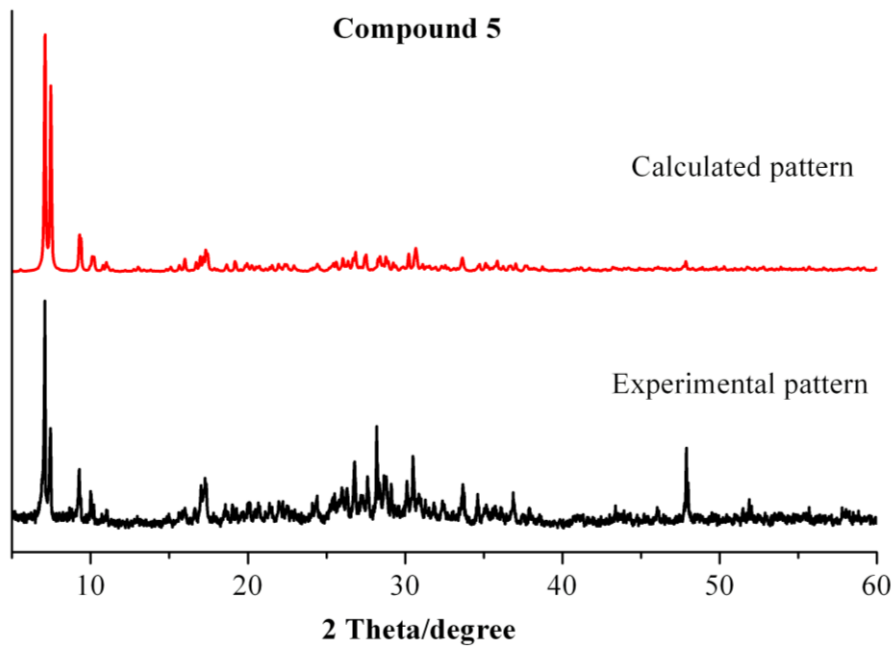

**Fig. S9e**

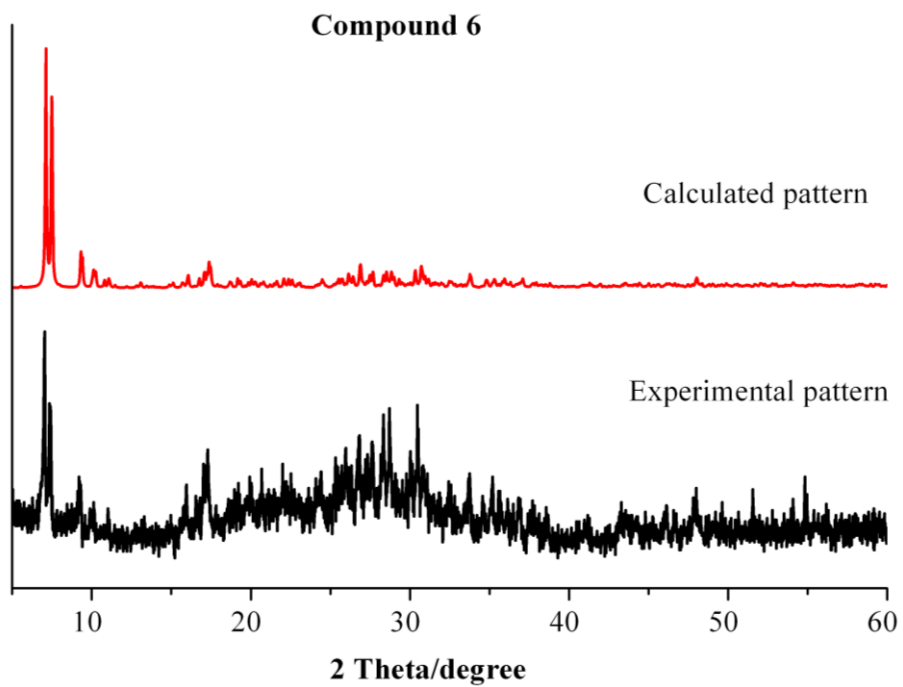

**Fig. S9f**
